# Supplementary material for: Reduced Rank Regression-Derived Dietary Patterns Related to the Fatty Liver Index and Associations with Type 2 Diabetes Mellitus among Ghanaian Populations under Transition: The RODAM Study
Source: MDPI journal article supplement (doi:10.3390/nu13113679), 2021-10-20
Supplement: s1 [file s1]

## Supplementary data

**Table S1.** Sensitivity analysis excluding study participants with self-reported diabetes. Percentage of explained variation in food intake and factor loadings of RRR-derived dietary pattern scores related with Fatty Liver Index among men and women.

| Food group               | Men (n = 1366)          |                | Women (n = 2321)        |                |
|--------------------------|-------------------------|----------------|-------------------------|----------------|
|                          | Explained variation (%) | Factor loading | Explained variation (%) | Factor loading |
| Poultry                  | <b>29.63</b>            | <b>0.32</b>    | 17.08                   | 0.30           |
| Coffee and tea           | <b>20.66</b>            | <b>0.27</b>    | <b>20.64</b>            | <b>0.33</b>    |
| Cereal                   | 19.81                   | 0.26           | 14.60                   | 0.28           |
| Condiments               | 19.06                   | 0.26           | 15.44                   | 0.29           |
| Potatoes                 | 14.01                   | 0.22           | 1.81                    | 0.10           |
| Margarine                | 7.28                    | 0.16           | 11.92                   | 0.25           |
| Alcohol                  | 9.61                    | 0.18           | 6.12                    | 0.18           |
| Fermented maize products | 17.98                   | -0.25          | 19.73                   | -0.32          |
| Refined and cereal       | <b>25.21</b>            | <b>-0.30</b>   | 11.48                   | -0.25          |
| Roots, tubers & plantain | <b>27.56</b>            | <b>-0.31</b>   | <b>21.68</b>            | <b>-0.34</b>   |
| Palm oil                 | <b>31.18</b>            | <b>-0.33</b>   | 15.70                   | -0.29          |
| <b>Total</b>             | 9.6                     |                | 6.3                     |                |

Factor loadings are correlations between food groups and the dietary pattern score. Figures in bold represent food groups with relevant contributions to the dietary pattern score ( $\geq 0.20\%$  explained variation in the factor loadings for either males or females).

**Table S2.** Associations of the FLI-related and RRR-derived dietary pattern scores with type 2 diabetes among males and females<sup>1</sup>.

| Model            | Odds Ratio (95% confidence interval) |                  |                  |                  |                  |             |                  |
|------------------|--------------------------------------|------------------|------------------|------------------|------------------|-------------|------------------|
|                  | Q1                                   | Q2               | Q3               | Q4               | Q5               | P for trend | per 1 score-SD   |
| Men              |                                      |                  |                  |                  |                  |             |                  |
| Diabetes/Control | 17/256                               | 22/251           | 31/243           | 46/227           | 43/230           |             |                  |
| Crude            | 1 (reference)                        | 1.30 (0.69,2.47) | 2.28 (1.27,4.11) | 3.25 (1.85,5.74) | 3.57 (2.04,6.27) | <.0001      | 1.70 (1.43,2.02) |
| Model 1          | 1 (reference)                        | 1.38 (0.71,2.69) | 2.12 (1.10,4.08) | 2.36 (1.13,4.96) | 2.43 (1.14,5.16) | 0.02        | 1.48 (1.16,1.88) |
| Model 2          | 1 (reference)                        | 1.22 (0.62,2.41) | 1.84 (0.95,3.57) | 2.09 (0.99,4.43) | 2.22 (1.02,4.86) | 0.033       | 1.51 (1.16,1.98) |
| Women            |                                      |                  |                  |                  |                  |             |                  |
| Diabetes/Control | 25/439                               | 38/426           | 32/433           | 47/417           | 47/417           |             |                  |
| Crude            | 1 (reference)                        | 1.84 (1.11,3.06) | 1.52 (0.90,2.57) | 2.36 (1.44,3.86) | 2.66 (1.64,4.32) | <.0001      | 1.32 (1.15,1.52) |
| Model 1          | 1 (reference)                        | 1.87 (1.11,3.14) | 1.53 (0.89,2.64) | 2.45 (1.45,4.15) | 2.67 (1.51,4.70) | 0.0006      | 1.31 (1.10,1.55) |
| Model 2          | 1 (reference)                        | 1.54 (0.91,2.62) | 1.24 (0.71,2.16) | 1.99 (1.16,3.40) | 2.31 (1.30,4.10) | 0.003       | 1.27 (1.07,1.52) |

<sup>1</sup>Odds ratios (ORs), 95% confidence intervals (CIs) were calculated by logistic regression. p-values for trend were calculated by modelling the median of the dietary pattern scores as the independent variable. Model 1: adjusted for age (years) and study site (categorical). Model 2: Model 1 + education (4 categories), energy intake (kcal/d), smoking (yes/no), physical activity (METs-h/week), alcohol (alcohol/day). Type 2 diabetes was defined as HbA1c  $\geq 48$  mmol/mol or self-reported diabetes or use of glucose-lowering medication.

**Table S3.** Pearson correlations between the biomarker-related dietary pattern score, food intake frequencies, and NAFLD biomarkers (log-transformed) among men (n=1,366).

| Food groups         | Cholesterol |         | LDL-Cho |         | HDL-Cho |         | AST   |         | ALT   |         | GGT   |         | Triglycerides |         | CRP  |         |
|---------------------|-------------|---------|---------|---------|---------|---------|-------|---------|-------|---------|-------|---------|---------------|---------|------|---------|
|                     | r           | partial | r       | partial | r       | partial | r     | partial | r     | partial | r     | partial | r             | partial | r    | partial |
| Whole grain cereals | 0.10        | -0.03   | 0.21    | -0.03   | 0.13    | 0.02    | -0.20 | -0.01   | -0.01 | -0.03   | -0.05 | -0.05   | -0.12         | -0.08   | 0.00 | 0.05    |

|                          |       |       |       |       |       |       |       |       |       |       |       |       |       |       |       |       |
|--------------------------|-------|-------|-------|-------|-------|-------|-------|-------|-------|-------|-------|-------|-------|-------|-------|-------|
| Poultry                  | 0.11  | 0.00  | 0.10  | 0.00  | 0.11  | 0.04  | -0.14 | 0.02  | 0.05  | 0.02  | -0.02 | -0.01 | -0.06 | -0.03 | -0.07 | -0.04 |
| Dairy products           | 0.10  | 0.05  | 0.09  | 0.04  | 0.13  | 0.08  | -0.11 | -0.01 | 0.02  | 0.00  | -0.07 | -0.06 | -0.09 | -0.05 | -0.03 | -0.01 |
| Coffee & tea             | 0.08  | -0.05 | 0.06  | -0.05 | 0.11  | 0.00  | -0.20 | -0.02 | -0.02 | -0.02 | -0.02 | -0.01 | -0.04 | 0.01  | -0.05 | -0.01 |
| Condiments               | 0.11  | 0.04  | 0.10  | 0.03  | 0.11  | 0.04  | -0.05 | 0.05  | 0.09  | 0.05  | -0.04 | -0.02 | -0.05 | -0.01 | -0.05 | -0.02 |
| Potatoes                 | 0.12  | 0.03  | 0.09  | 0.01  | 0.14  | 0.05  | -0.10 | 0.06  | 0.05  | 0.06  | 0.03  | 0.04  | -0.01 | 0.05  | -0.05 | -0.02 |
| Margarine                | 0.04  | -0.05 | 0.04  | -0.04 | 0.05  | -0.03 | -0.16 | -0.04 | -0.01 | -0.01 | -0.02 | -0.02 | -0.05 | -0.02 | -0.06 | -0.04 |
| Olive oil                | 0.05  | -0.02 | 0.06  | -0.01 | 0.06  | 0.00  | -0.11 | -0.01 | 0.04  | 0.03  | -0.06 | -0.05 | -0.07 | -0.05 | -0.05 | -0.03 |
| Palm oil                 | -0.13 | -0.01 | -0.11 | 0.00  | -0.12 | -0.04 | 0.15  | -0.02 | -0.04 | -0.02 | 0.02  | 0.01  | 0.05  | 0.01  | 0.07  | 0.04  |
| Roots, tubers & plantain | -0.12 | -0.01 | -0.12 | -0.02 | -0.09 | -0.03 | 0.14  | 0.01  | -0.02 | 0.02  | 0.08  | 0.08  | 0.07  | 0.05  | 0.00  | -0.03 |
| Fermented maize products | -0.10 | 0.01  | -0.09 | 0.00  | -0.07 | 0.03  | 0.18  | 0.03  | -0.01 | -0.01 | 0.02  | 0.01  | 0.03  | -0.01 | 0.04  | 0.01  |
| Vegetarian mixed dishes  | -0.03 | 0.05  | -0.01 | 0.06  | -0.08 | 0.00  | 0.13  | 0.01  | 0.06  | 0.07  | 0.04  | 0.03  | 0.07  | 0.03  | 0.07  | 0.04  |
| Fish                     | 0.02  | 0.05  | 0.05  | 0.07  | -0.08 | -0.02 | 0.07  | 0.01  | 0.03  | 0.02  | 0.05  | 0.04  | 0.03  | -0.01 | 0.03  | 0.02  |

Partial correlation coefficients are adjusted for age, body mass index, and study site. Only food groups with factor loadings  $\geq 0.15$  are shown..

**Table S4.** Pearson correlations between the biomarker-related dietary pattern score, food intake frequencies, and NAFLD biomarkers (log-transformed) among women (n = 2,321).

| Food group               | Cholesterol |           | LDL-Cho |           | HDL-Cho |           | AST   |           | ALT   |           | GGT   |           | Triglycerides |           | CRP   |           |
|--------------------------|-------------|-----------|---------|-----------|---------|-----------|-------|-----------|-------|-----------|-------|-----------|---------------|-----------|-------|-----------|
|                          | r           | partial r | r       | partial r | r       | partial r | r     | partial r | r     | partial r | r     | partial r | r             | partial r | r     | partial r |
| Whole grain cereals      | -0.01       | -0.04     | -0.02   | -0.03     | 0.15    | 0.00      | -0.17 | 0.06      | -0.02 | 0.07      | -0.01 | 0.01      | -0.21         | -0.09     | 0.07  | -0.02     |
| Poultry                  | -0.03       | -0.04     | -0.05   | -0.04     | 0.15    | 0.02      | -0.24 | -0.04     | -0.08 | -0.01     | -0.04 | -0.04     | -0.19         | -0.04     | -0.03 | 0.00      |
| Dairy products           | 0.00        | 0.01      | -0.01   | 0.01      | 0.12    | 0.04      | -0.11 | 0.01      | -0.03 | 0.02      | -0.01 | 0.01      | -0.15         | -0.06     | -0.06 | -0.04     |
| Coffee & tea             | 0.01        | -0.01     | -0.02   | -0.03     | 0.21    | 0.05      | -0.27 | -0.04     | -0.13 | -0.05     | -0.03 | -0.03     | -0.19         | -0.03     | -0.03 | 0.01      |
| Condiments               | -0.02       | 0.01      | -0.03   | 0.01      | 0.15    | 0.02      | -0.22 | 0.00      | -0.09 | -0.01     | -0.01 | 0.02      | -0.20         | -0.03     | 0.00  | 0.03      |
| Potatoes                 | -0.06       | -0.06     | -0.08   | -0.07     | 0.16    | 0.00      | -0.18 | 0.01      | -0.06 | 0.02      | -0.03 | -0.01     | -0.19         | -0.05     | -0.02 | 0.03      |
| Margarine                | -0.01       | -0.03     | -0.02   | -0.03     | 0.10    | -0.01     | -0.14 | 0.01      | -0.05 | 0.01      | -0.04 | -0.04     | -0.14         | -0.05     | -0.05 | -0.03     |
| Olive oil                | -0.01       | -0.03     | -0.03   | -0.04     | 0.15    | 0.08      | -0.11 | 0.00      | -0.05 | -0.01     | -0.04 | -0.04     | -0.17         | -0.11     | -0.06 | -0.04     |
| Palm oil                 | -0.03       | -0.02     | -0.02   | -0.03     | -0.17   | -0.03     | 0.20  | 0.01      | 0.08  | 0.02      | 0.02  | 0.02      | 0.18          | 0.05      | 0.03  | 0.01      |
| Roots, tubers & plantain | -0.06       | -0.07     | -0.04   | -0.06     | -0.14   | -0.05     | 0.15  | -0.02     | 0.05  | -0.01     | 0.02  | 0.02      | 0.10          | -0.02     | 0.00  | -0.01     |
| Fermented maize products | -0.04       | -0.01     | -0.03   | -0.02     | -0.09   | 0.02      | 0.11  | -0.03     | 0.03  | -0.03     | -0.02 | -0.01     | 0.07          | -0.01     | 0.03  | 0.02      |
| Vegetarian mixed dishes  | 0.08        | 0.09      | 0.09    | 0.08      | -0.11   | 0.00      | 0.20  | 0.06      | 0.08  | 0.03      | 0.05  | 0.05      | 0.18          | 0.07      | 0.03  | 0.00      |
| Fish                     | 0.10        | 0.10      | 0.13    | 0.12      | -0.10   | -0.05     | 0.09  | 0.04      | 0.03  | -0.01     | 0.06  | 0.05      | 0.12          | 0.07      | 0.06  | 0.03      |

Partial correlation coefficients are adjusted for age, body mass index, and study site. Only food groups with factor loadings  $\geq 0.15$  are shown.

**Table S5.** Sensitivity analysis excluding study participants with self-reported diabetes. Percentage of explained variation in food intake and factor loadings of RRR-derived dietary pattern scores, and explained variation in NAFLD biomarkers and response weights among men and women.

| Food group               | Men (n=1,250)           |                | Women (n = 2,178)       |                |
|--------------------------|-------------------------|----------------|-------------------------|----------------|
|                          | Explained variation (%) | Factor loading | Explained variation (%) | Factor loading |
| Whole grain cereal       | 34.3                    | 0.32           | 24.93                   | -0.26          |
| Coffee tea               | 25.07                   | 0.28           | 44.64                   | -0.35          |
| Condiments               | 21.03                   | 0.25           | 33.11                   | -0.3           |
| Dairy products           | 23.24                   | 0.26           | 14.13                   | -0.2           |
| Fermented maize products | 22.09                   | -0.26          | 5.58                    | 0.12           |
| Margarine                | 16.35                   | 0.22           | 15.2                    | -0.21          |
| Olive oil                | 14.54                   | 0.21           | 19.13                   | -0.23          |
| Palm oil                 | 30.83                   | -0.31          | 26.89                   | 0.27           |
| Potatoes                 | 18.69                   | 0.24           | 27.82                   | -0.28          |
| Poultry                  | 24.99                   | 0.27           | 34.85                   | -0.31          |
| Roots, tubers & plantain | 30.95                   | -0.31          | 12.26                   | 0.18           |

|                         |                                |                        |                                |                        |
|-------------------------|--------------------------------|------------------------|--------------------------------|------------------------|
| Vegetarian mixed dishes | 9.38                           | -0.17                  | 27.32                          | 0.28                   |
| <b>Total</b>            | <b>11.03</b>                   |                        | <b>12.02</b>                   |                        |
| <b>Biomarker</b>        | <b>Explained variation (%)</b> | <b>Response weight</b> | <b>Explained variation (%)</b> | <b>Response weight</b> |
| Cholesterol             | 5.46                           | 0.46                   | 0.25                           | 0.08                   |
| LDL-Cholesterol         | 5.47                           | 0.46                   | 0.86                           | 0.15                   |
| HDL-Cholesterol         | 2.84                           | 0.33                   | 8.31                           | -0.48                  |
| AST                     | 7.76                           | -0.55                  | 12.6                           | 0.59                   |
| GGT                     | 2.67                           | -0.32                  | 0.39                           | 0.10                   |
| Triglycerides           | 1.5                            | -0.24                  | 10.93                          | 0.55                   |
| C-reactive protein      | 0.3                            | -0.11                  | 0.37                           | 0.10                   |
| ALT                     | 0.07                           | 0.05                   | 2.35                           | 0.26                   |
| <b>Total</b>            | <b>3.25</b>                    |                        | <b>4.51</b>                    |                        |

**Table S6.** Associations of the biomarker-related and RRR-derived dietary pattern scores with type 2 diabetes among males and females<sup>1</sup>.

| Odds ratio (95% confidence interval) |               |                  |                  |                  |                  |             |                  |
|--------------------------------------|---------------|------------------|------------------|------------------|------------------|-------------|------------------|
|                                      | Q1            | Q2               | Q3               | Q4               | Q5               | P for trend | per 1 score-SD   |
| Men                                  |               |                  |                  |                  |                  |             |                  |
| Diabetes/Control                     | 15/258        | 27/246           | 33/241           | 47/226           | 37/236           |             |                  |
| Crude                                | 1 (reference) | 1.72 (0.92,3.2)  | 2.65 (1.47,4.79) | 3.80 (2.14,6.74) | 2.89 (1.61,5.21) | <.0001      | 1.46 (1.24,1.72) |
| Model 1                              | 1 (reference) | 1.71 (0.89,3.29) | 2.22 (1.13,4.36) | 2.34 (1.08,5.07) | 1.59 (0.73,3.46) | 0.61        | 1.12 (0.88,1.43) |
| Model 2                              | 1 (reference) | 1.62 (0.84,3.14) | 1.98 (0.99,3.96) | 2.00 (0.91,4.40) | 1.38 (0.61,3.09) | 1.23        | 1.09 (0.84,1.41) |
| Model 3                              | 1 (reference) | 1.44(0.74,2.79)  | 1.53 (0.75,3.10) | 1.52 (0.68,3.41) | 1.07 (0.47,2.44) | 1.17        | 1.01 (0.78,1.32) |
| Women                                |               |                  |                  |                  |                  |             |                  |
| Diabetes/Control                     | 37/427        | 38/426           | 36/429           | 36/430           | 44/420           |             |                  |
| Crude                                | 1 (reference) | 0.98 (0.64,1.50) | 0.79 (0.50,1.24) | 0.91 (0.59,1.40) | 1.02 (0.67,1.57) | 0.96        | 1.02 (0.89,1.17) |
| Model 1                              | 1 (reference) | 1.19 (0.76,1.87) | 1.36 (0.74,2.52) | 1.52 (0.80,2.87) | 1.51 (0.79,2.88) | 0.23        | 1.30 (1.04,1.63) |
| Model 2                              | 1 (reference) | 1.12 (0.70,1.78) | 1.17 (0.61,2.24) | 1.25 (0.63,2.47) | 1.25 (0.63,2.48) | 0.55        | 1.24 (0.97,1.58) |
| Model 3                              | 1 (reference) | 1.08 (0.67,1.73) | 1.14 (0.59,2.20) | 1.27 (0.64,2.55) | 1.31 (0.65,2.63) | 0.40        | 1.27 (0.99,1.62) |

<sup>1</sup>Odds ratios (ORs), 95% confidence intervals (CIs) were calculated by logistic regression. p-values for trend were calculated by modelling the median of the dietary pattern scores as the independent variable. Model 1: adjusted for age (years) and study site (categorical). Model 2: Model 1 + education (4 categories), energy intake (kcal/d), smoking (yes/no), physical activity (METs-h/week), alcohol (alcohol/day). Model 3: Model 2 + BMI (kg/m<sup>2</sup>), waist circumference (cm). Type 2 diabetes was defined as HbA1c  $\geq$ 48mmol/mol or self-reported diabetes or use of glucose-lowering medication.

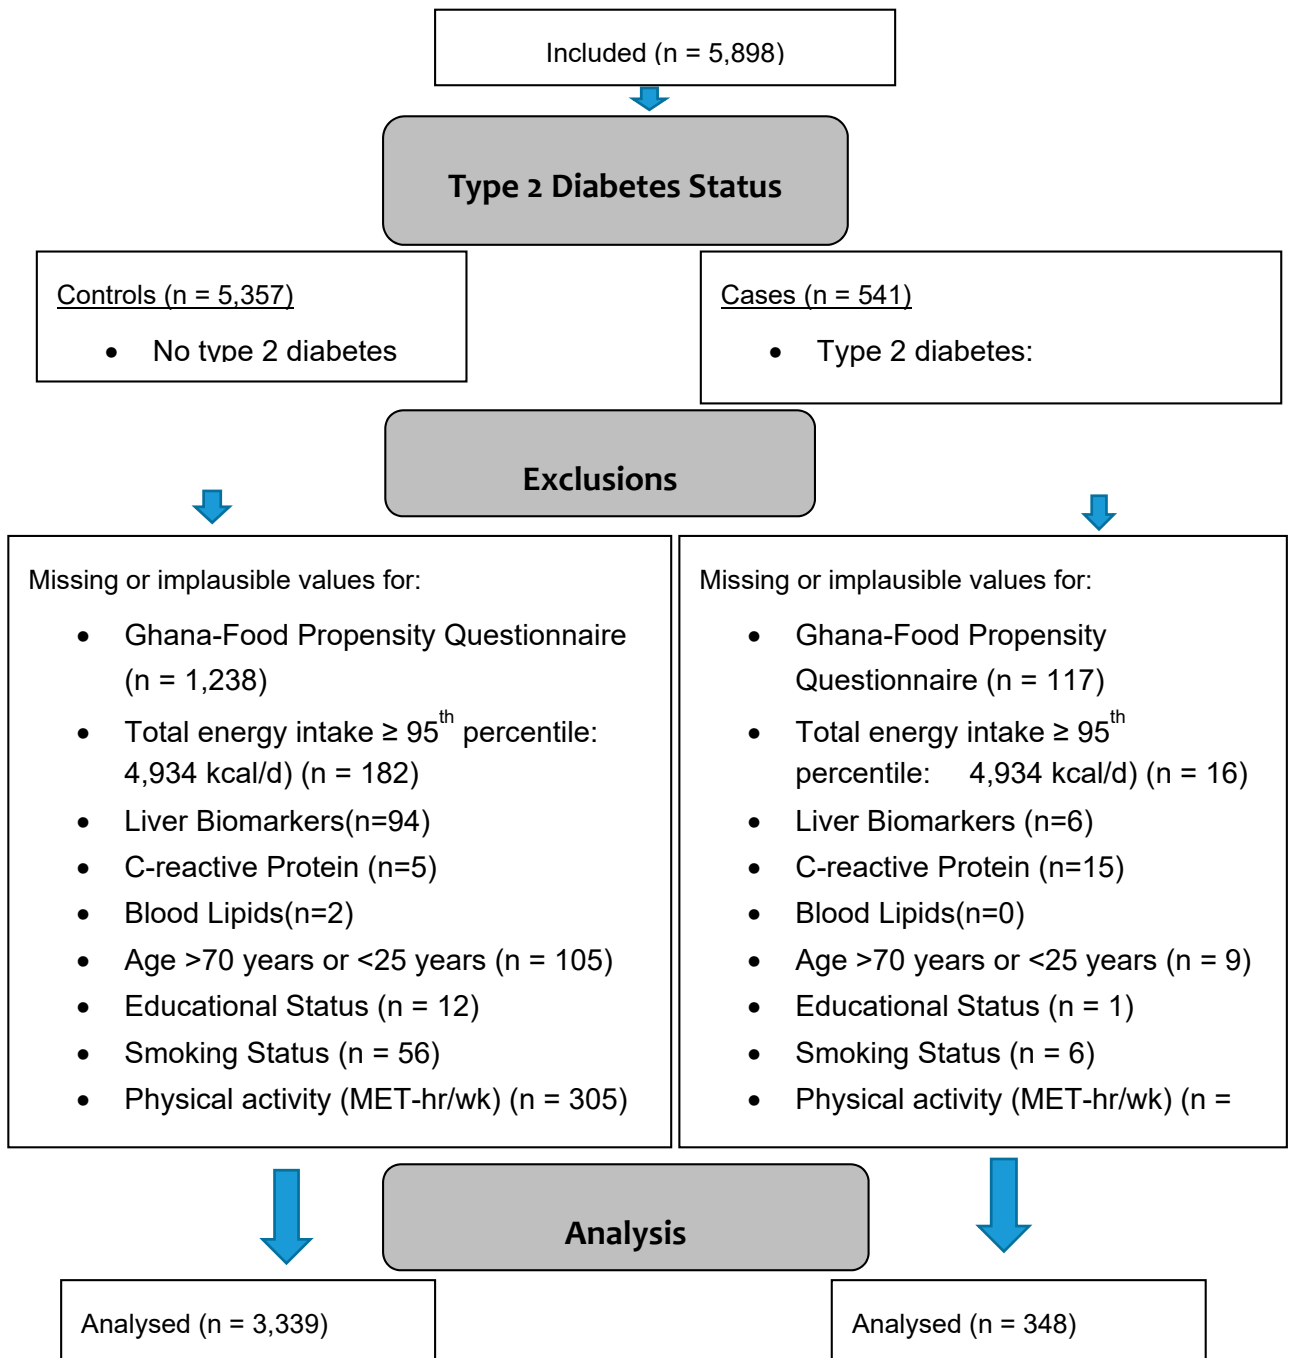

**Figure S1.** present the flow diagram of excluded participants because of missing or implausible data resulting in a simple size of 3687 participants for the characterization of dietary pattern.
